# Supplementary material
Source: publisher figshare collection journal article supplement (https://tandf.figshare.com/ndownloader/files/3156596)
Supplement: Supplementary file 1 [file 3156596]

## Sheet: allele frequencies
Australian Aboriginal declared allele frequencies
Allele	CSF	D12	D13	D16	D18	D19	D1	D21	D2S	D3	D5	D6	D7	D8	FGA	Penta D	Penta E	TH01	TPOX	vWA
2.2	0	0	0	0	0	0	0	0	0	0	0	0	0	0	0	0.000705219	0	0	0	0
5	0	0	0	0	0	0	0	0	0	0	0	0	0	0	0	0	0.0510096	0.00280308	0.00035727	0
5.3	0	0	0	0	0	0	0	0	0	0	0	0	0.000350508	0	0	0	0	0	0	0
6	0	0	0.000703235	0	0	0	0	0	0	0	0	0	0	0	0	0.000352609	0	0.314996	0.00107181	0
6.3	0	0	0	0	0	0	0	0	0	0	0	0	0	0	0	0	0	0	0	0
7	0.000353482	0	0.00281294	0.000350018	0	0	0	0	0	0	0	0	0.00771118	0	0	0.00669958	0.0828905	0.222495	0.00107181	0
7.3	0	0	0	0	0	0	0	0	0	0	0	0	0.00350508	0	0	0	0	0	0	0
8	0.00600919	0	0.246132	0.0080504	0	0	0	0	0	0	0.00351741	0	0.277603	0.00874738	0	0.0567701	0.00566773	0.133497	0.342265	0
8.1	0	0	0	0	0	0	0	0	0	0	0	0	0.000350508	0	0	0	0	0	0	0
8.3	0	0	0	0	0	0	0	0	0	0	0	0	0.000350508	0	0	0	0	0	0	0
9	0.0166136	0	0.0608298	0.0735037	0.000349895	0	0	0	0	0	0.0538164	0.00140302	0.11006	0.00979706	0	0.228491	0.00814736	0.167835	0.34298	0
9.1	0	0	0.000351617	0	0	0	0	0	0	0	0	0	0	0	0	0.000352609	0	0	0	0
9.2	0	0	0	0	0	0	0	0	0	0	0	0	0	0	0	0	0	0	0	0
9.3	0	0	0	0	0	0	0	0	0	0	0	0	0	0	0	0	0	0.149615	0	0
10	0.227289	0	0.0502813	0.0878544	0.00524843	0.00175131	0.0035014	0	0	0	0.170243	0.0249035	0.212758	0.0559832	0	0.134697	0.0503011	0.00875964	0.0450161	0
10.1	0	0	0	0	0	0	0	0	0	0	0.00351741	0	0	0	0	0	0	0	0	0
10.3	0.000353482	0	0	0	0	0	0	0	0	0	0	0.000350754	0	0	0	0	0	0	0	0
11	0.294097	0	0.305907	0.368918	0.0293912	0.00490368	0.0406162	0	0	0.00139958	0.307773	0.269379	0.216614	0.0804759	0	0.219676	0.0630535	0	0.244373	0
11.1	0	0	0	0	0	0	0	0	0	0	0.00105522	0	0.000350508	0	0	0	0	0	0	0
11.2	0	0	0	0	0	0.000350263	0	0	0	0	0	0	0	0	0	0	0	0	0	0
11.3	0	0	0	0	0	0	0	0	0	0	0	0	0	0	0	0	0	0	0	0
12	0.36444	0	0.238045	0.292265	0.0909727	0.0707531	0.0973389	0	0	0.00104969	0.314808	0.211505	0.144059	0.137859	0	0.196403	0.0935175	0	0.0228653	0
12.1	0	0	0	0	0	0	0	0	0	0	0.000351741	0	0	0	0	0	0	0	0	0
12.2	0	0	0	0	0	0	0	0	0	0	0	0	0	0	0	0	0	0	0	0
13	0.0798869	0	0.0706751	0.136857	0.158153	0.305779	0.122199	0	0	0.00209937	0.13331	0.0701508	0.022082	0.260672	0	0.117066	0.0719093	0	0	0.00245098
13.1	0	0	0	0	0	0	0	0	0	0	0.000351741	0	0	0	0	0	0	0	0	0
13.2	0	0	0	0	0	0.0056042	0	0	0	0	0	0	0	0	0	0	0	0	0	0
13.3	0	0	0	0	0	0	0.00035014	0	0	0	0	0	0	0	0	0	0	0	0	0
13.4	0	0	0	0	0	0	0	0	0	0	0	0	0	0	0	0	0	0	0	0
14	0.00954401	0.00070028	0.0221519	0.0287014	0.158153	0.383187	0.1243	0	0.000351989	0.0710287	0.0105522	0.0452473	0.0042061	0.206438	0	0.0257405	0.0913921	0	0	0.0728291
14.2	0	0	0	0	0	0.0196147	0	0	0	0	0	0	0	0	0	0	0	0	0	0
14.3	0	0	0	0	0	0	0.00245098	0	0	0	0	0	0	0	0	0	0	0	0	0
15	0.00141393	0.0448179	0.0021097	0.00350018	0.136109	0.132049	0.169818	0	0.00175994	0.322253	0.000703482	0.00596282	0	0.153954	0	0.0102257	0.0722635	0	0	0.0766807
15.2	0	0	0	0	0	0.028021	0	0	0	0	0	0	0	0	0	0	0	0	0	0
15.3	0	0	0	0	0	0	0.0276611	0	0	0	0	0	0	0.000349895	0	0	0	0	0	0
15.4	0	0	0	0	0	0	0	0	0	0	0	0	0	0	0	0	0	0	0	0
16	0	0.0339636	0	0	0.128062	0.0315236	0.17507	0	0.0172474	0.26662	0	0.0038583	0	0.0605318	0.000701016	0.000705219	0.0807651	0	0	0.220938
16.1	0	0	0	0	0	0	0	0	0	0	0	0	0	0	0	0	0	0	0	0
16.2	0	0	0	0	0	0.0105079	0	0	0	0	0	0	0	0	0	0	0	0	0	0
16.3	0	0	0	0	0	0	0.0339636	0	0	0	0	0	0	0	0	0	0	0	0	0
17	0	0.14881	0	0	0.107768	0.00350263	0.072479	0	0.117564	0.208537	0	0.0273588	0	0.0213436	0.0042061	0.00141044	0.0889125	0	0	0.271359
17.1	0	0	0	0	0	0	0	0	0	0	0	0	0	0	0	0	0	0	0	0
17.2	0	0	0	0	0	0.00175131	0	0	0	0	0	0	0	0	0	0	0	0	0	0
17.3	0	0.0133053	0	0	0	0	0.0679272	0	0	0	0	0	0	0	0	0	0	0	0	0
17.4	0	0	0	0	0	0	0	0	0	0	0	0	0	0	0	0	0	0	0	0
18	0	0.226541	0	0	0.0797761	0	0.0220588	0	0.0718057	0.112316	0	0.0778674	0	0.00384885	0.0290922	0	0.0676585	0	0	0.228291
18.2	0	0	0	0	0	0.000700525	0	0	0	0	0	0.000350754	0	0	0	0	0	0	0	0
18.3	0	0.0147059	0	0	0	0	0.0245098	0	0	0	0	0.00350754	0	0	0	0	0	0	0	0
18.4	0	0	0	0	0	0	0	0	0	0	0	0	0	0	0	0	0	0	0	0
19	0	0.152661	0	0	0.0493352	0	0.00945378	0	0.217881	0.013296	0	0.0929498	0	0	0.062741	0	0.0566773	0	0	0.104342
19.1	0	0.00035014	0	0	0	0	0	0	0	0	0	0	0	0	0	0	0	0	0	0
19.2	0	0	0	0	0	0	0	0	0	0	0	0.00350754	0	0	0.000350508	0	0	0	0	0
19.3	0	0.00455182	0	0	0	0	0.0052521	0	0	0	0	0.0364784	0	0	0	0	0	0	0	0
20	0	0.103641	0	0	0.0269419	0	0.00105042	0	0.12038	0.00139958	0	0.021396	0	0	0.117771	0	0.0488842	0	0	0.0206583
20.1	0	0	0	0	0	0	0	0	0	0	0	0	0	0	0.000350508	0	0	0	0	0
20.2	0	0	0	0	0	0	0	0	0	0	0	0.00210452	0	0	0.00105152	0	0	0	0	0
20.3	0	0	0	0	0	0	0	0	0	0	0	0.0462995	0	0	0	0	0	0	0	0
21	0	0.089986	0	0	0.016795	0	0	0	0.0418867	0	0	0.00666433	0	0	0.140554	0	0.0276302	0	0	0.00210084
21.1	0	0	0	0	0	0	0	0	0	0	0	0	0	0	0	0	0	0	0	0
21.2	0	0	0	0	0	0	0	0	0	0	0	0.000350754	0	0	0.00280407	0	0	0	0	0
21.3	0	0.00035014	0	0	0	0	0	0	0	0	0	0.039986	0	0	0	0	0	0	0	0
22	0	0.0742297	0	0	0.00944717	0	0	0	0.062302	0	0	0	0	0	0.156677	0	0.0194828	0	0	0.00035014
22.1	0	0	0	0	0	0	0	0	0	0	0	0	0	0	0	0	0	0	0	0
22.2	0	0.00105042	0	0	0	0	0	0	0	0	0	0	0	0	0.00525762	0	0	0	0	0
22.3	0	0	0	0	0	0	0	0	0	0	0	0.00701508	0	0	0	0	0	0	0	0
23	0	0.0483193	0	0	0.00209937	0	0	0	0.126716	0	0	0	0	0	0.156677	0	0.00956429	0	0	0
23.2	0	0	0	0	0	0	0	0	0	0	0	0	0	0	0.00350508	0	0	0	0	0
23.3	0	0	0	0	0	0	0	0	0	0	0	0.00140302	0	0	0	0	0	0	0	0
24	0	0.0276611	0	0	0.00104969	0	0	0	0.106653	0	0	0	0	0	0.161584	0	0.00566773	0	0	0
24.2	0	0	0	0	0	0	0	0.000350754	0	0	0	0	0	0	0.00175254	0	0	0	0	0
24.3	0	0	0	0	0	0	0	0	0	0	0	0	0	0	0.000350508	0	0	0	0	0
25	0	0.0122549	0	0	0	0	0	0.000350754	0.093629	0	0	0	0	0	0.102348	0	0.0031881	0	0	0
25.2	0	0	0	0	0	0	0	0.000350754	0	0	0	0	0	0	0.000701016	0	0	0	0	0
26	0	0.0017507	0	0	0.000349895	0	0	0.00105226	0.0190074	0	0	0	0	0	0.042061	0	0	0	0	0
26.1	0	0	0	0	0	0	0	0	0	0	0	0	0	0	0	0	0.000354233	0	0	0
26.2	0	0	0	0	0	0	0	0	0	0	0	0	0	0	0	0	0	0	0	0
27	0	0.00035014	0	0	0	0	0	0.017187	0.00105597	0	0	0	0	0	0.00806169	0	0	0	0	0
27.2	0	0	0	0	0	0	0	0	0	0	0	0	0	0	0	0	0	0	0	0
28	0	0	0	0	0	0	0	0.122413	0.00175994	0	0	0	0	0	0.00140203	0	0	0	0	0
28.2	0	0	0	0	0	0	0	0	0	0	0	0	0	0	0	0	0	0	0	0
29	0	0	0	0	0	0	0	0.215363	0	0	0	0	0	0	0	0	0	0	0	0
29.1	0	0	0	0	0	0	0	0.000350754	0	0	0	0	0	0	0	0	0	0	0	0
29.2	0	0	0	0	0	0	0	0.00140302	0	0	0	0	0	0	0	0	0	0	0	0
29.3	0	0	0	0	0	0	0	0.000350754	0	0	0	0	0	0	0	0	0	0	0	0
30	0	0	0	0	0	0	0	0.196072	0	0	0	0	0	0	0	0	0	0	0	0
30.1	0	0	0	0	0	0	0	0	0	0	0	0	0	0	0	0	0	0	0	0
30.2	0	0	0	0	0	0	0	0.038583	0	0	0	0	0	0	0	0	0	0	0	0
31	0	0	0	0	0	0	0	0.0634865	0	0	0	0	0	0	0	0	0	0	0	0
31.1	0	0	0	0	0	0	0	0	0	0	0	0	0	0	0	0	0	0	0	0
31.2	0	0	0	0	0	0	0	0.109786	0	0	0	0	0	0	0	0	0	0	0	0
32	0	0	0	0	0	0	0	0.0154332	0	0	0	0	0	0	0	0	0	0	0	0
32.1	0	0	0	0	0	0	0	0.000350754	0	0	0	0	0	0	0	0	0	0	0	0
32.2	0	0	0	0	0	0	0	0.111891	0	0	0	0	0	0	0	0	0	0	0	0
32.3	0	0	0	0	0	0	0	0	0	0	0	0	0	0	0	0	0	0	0	0
33	0	0	0	0	0	0	0	0.00175377	0	0	0	0	0	0	0	0	0	0	0	0
33.1	0	0	0	0	0	0	0	0.000350754	0	0	0	0	0	0	0	0	0	0	0	0
33.2	0	0	0	0	0	0	0	0.0403367	0	0	0	0	0	0	0	0	0	0	0	0
33.3	0	0	0	0	0	0	0	0	0	0	0	0	0	0	0	0	0	0	0	0
34	0	0	0	0	0	0	0	0	0	0	0	0	0	0	0	0	0	0	0	0
34.2	0	0	0	0	0	0	0	0.00806734	0	0	0	0	0	0	0	0	0	0	0	0
35	0	0	0	0	0	0	0	0	0	0	0	0	0	0	0	0	0	0	0	0
35.2	0	0	0	0	0	0	0	0.0196422	0	0	0	0	0	0	0	0	0	0	0	0
36.2	0	0	0	0	0	0	0	0.0136794	0	0	0	0	0	0	0	0	0	0	0	0
37.2	0	0	0	0	0	0	0	0.0101719	0	0	0	0	0	0	0	0	0	0	0	0
38.2	0	0	0	0	0	0	0	0.00806734	0	0	0	0	0	0	0	0	0	0	0	0
39.2	0	0	0	0	0	0	0	0.00210452	0	0	0	0	0	0	0	0	0	0	0	0
40.2	0	0	0	0	0	0	0	0.000350754	0	0	0	0	0	0	0	0	0	0	0	0
R	0	0	0	0	0	0	0	0.000701508	0	0	0	0	0	0	0	0.000705219	0.0010627	0	0	0
N	2829	2856	2844	2857	2858	2855	2856	2851	2841	2858	2843	2851	2853	2858	2853	2836	2823	2854	2799	2856
p-value	0.4015	0.0867	0.7027	0.0002	0.0834	0.1883	0.0065	0.1054	0.1566	0.2378	0.3725	0.5088	0.2166	0.9892	0.657	0.0685	0	0.2356	0	0.7499
-2ln(p)	1.8251	4.8906	0.70565	17.0344	4.96821	3.33944	10.0719	4.49999	3.70812	2.87265	1.97504	1.3514	3.05941	0.0217175	0.840143	5.36184	NA	2.89124	NA	0.575631
HO	0.70049	0.862141	0.768369	0.741078	0.871938	0.729181	0.872638	0.859342	0.845346	0.746676	0.724983	0.83345	0.802659	0.825752	0.871239	0.811057	0.891533	0.784848	0.627273	0.783838
HE	0.731706	0.837009	0.747108	0.751952	0.870584	0.712425	0.857082	0.87313	0.867152	0.743423	0.764772	0.863614	0.755843	0.832333	0.873018	0.80998	0.927407	0.734611	0.688151	0.799943
NT Aboriginal pure allele frequencies
Allele	CSF	D12	D13	D16	D18	D19	D1	D21	D2S	D3	D5	D6	D7	D8	FGA	Penta D	Penta E	TH01	TPOX	vWA
2.2	0	0	0	0	0	0	0	0	0	0	0	0	0	0	0	0	0	0	0	0
5	0	0	0	0	0	0	0	0	0	0	0	0	0	0	0	0	0.0262664	0	0	0
5.3	0	0	0	0	0	0	0	0	0	0	0	0	0	0	0	0	0	0	0	0
6	0	0	0	0	0	0	0	0	0	0	0	0	0	0	0	0	0	0.380037	0	0
6.3	0	0	0	0	0	0	0	0	0	0	0	0	0	0	0	0	0	0	0	0
7	0	0	0.00552486	0	0	0	0	0	0	0	0.000924214	0	0.015625	0	0	0.00468604	0.0272045	0.259158	0.00280899	0
7.3	0	0	0	0	0	0	0	0	0	0	0	0	0.00643382	0	0	0	0	0	0	0
8	0.0111836	0	0.333333	0.010989	0	0	0	0	0	0	0	0.00457875	0.373162	0.00184162	0	0.0965323	0.00469043	0.136447	0.190075	0
8.1	0	0	0.00092081	0	0	0	0	0	0	0	0	0	0	0	0	0	0	0	0	0
8.3	0	0	0	0	0	0	0	0	0	0	0	0	0.000919118	0	0	0	0	0	0	0
9	0.0102516	0	0.038674	0.0247253	0	0	0	0	0	0	0.0674677	0.003663	0.0615809	0.00276243	0	0.251172	0.011257	0.182234	0.467228	0
9.1	0	0	0	0	0	0	0	0	0	0	0	0	0	0	0	0	0	0	0	0
9.2	0	0	0	0	0	0	0	0	0	0	0	0	0	0	0	0	0	0	0	0
9.3	0	0	0	0	0	0	0	0	0	0	0	0	0	0	0	0	0	0.0384615	0	0
10	0.216216	0	0.053407	0.100733	0.00275229	0	0.0174312	0	0	0	0.246765	0.0164835	0.195772	0.0267035	0	0.137769	0.0225141	0.00274725	0.0533708	0
10.1	0	0	0	0	0	0	0	0	0	0	0.00184843	0	0	0	0	0	0	0	0	0
10.3	0	0	0	0	0	0	0	0	0	0	0	0	0	0	0	0	0	0	0	0
11	0.324324	0	0.305709	0.389194	0.059633	0.0018315	0.012844	0	0	0.0018315	0.253235	0.210623	0.244485	0.0902394	0	0.260544	0.0637899	0.000915751	0.275281	0
11.1	0	0	0	0	0	0	0	0	0	0	0	0	0	0	0	0	0	0	0	0
11.2	0	0	0	0	0	0	0	0	0	0	0	0	0	0	0	0.000937207	0	0	0	0
11.3	0	0	0	0	0	0	0	0	0	0	0	0	0	0	0	0	0	0	0	0
12	0.340168	0	0.200737	0.272894	0.0330275	0.0879121	0.0889908	0	0	0.000915751	0.268946	0.203297	0.0845588	0.162983	0	0.166823	0.0525328	0	0.011236	0
12.1	0	0	0	0	0	0	0	0	0	0	0	0	0	0	0	0	0	0	0	0
12.2	0	0	0	0	0	0	0	0	0	0	0	0	0	0	0	0	0	0	0	0
13	0.0876048	0	0.0414365	0.173077	0.216514	0.342491	0.191743	0	0	0.00274725	0.140481	0.0824176	0.015625	0.231123	0	0.0656045	0.0478424	0	0	0
13.1	0	0	0	0	0	0	0	0	0	0	0	0	0	0	0	0	0	0	0	0
13.2	0	0	0	0	0	0.00549451	0	0	0	0	0	0	0	0	0	0	0	0	0	0
13.3	0	0	0	0	0	0	0	0	0	0	0	0	0	0	0	0	0	0	0	0
13.4	0	0	0	0	0	0	0	0	0	0	0	0	0	0	0	0	0	0	0	0
14	0.00931966	0.00184843	0.0202578	0.0283883	0.179817	0.415751	0.133945	0	0	0.0412088	0.0147874	0.010989	0.00183824	0.158379	0	0.0131209	0.0919325	0	0	0.0384615
14.2	0	0	0	0	0	0.000915751	0	0	0	0	0	0	0	0	0	0	0	0	0	0
14.3	0	0	0	0	0	0	0.000917431	0	0	0	0	0	0	0	0	0	0	0	0	0
15	0.000931966	0.0785582	0	0	0.110092	0.0998168	0.172477	0	0	0.385531	0.00554529	0.00274725	0	0.210866	0	0.000937207	0.0825516	0	0	0.0641026
15.2	0	0	0	0	0	0.0100733	0	0	0	0.000915751	0	0	0	0	0	0	0	0	0	0
15.3	0	0	0	0	0	0	0.00825688	0	0	0	0	0	0	0.00460405	0	0	0	0	0	0
15.4	0	0	0	0	0	0	0	0	0	0	0	0	0	0	0	0	0	0	0	0
16	0	0.0304991	0	0	0.138532	0.029304	0.221101	0	0.00732601	0.235348	0	0.000915751	0	0.0883978	0.00183486	0.000937207	0.102251	0	0	0.239011
16.1	0	0	0	0	0	0	0	0	0	0	0	0	0	0	0	0	0	0	0	0
16.2	0	0	0	0	0	0.003663	0	0	0	0	0	0	0	0	0	0	0	0	0	0
16.3	0	0	0	0	0	0	0.00550459	0	0	0	0	0	0	0	0	0	0	0	0	0
17	0	0.182994	0	0	0.0541284	0.000915751	0.0908257	0	0.0824176	0.20696	0	0.0155678	0	0.0202578	0.00275229	0.000937207	0.133208	0	0	0.285714
17.1	0	0	0	0	0	0	0	0	0	0	0	0	0	0	0	0	0	0	0	0
17.2	0	0	0	0	0	0	0	0	0	0	0	0	0	0	0	0	0	0	0	0
17.3	0	0.00739372	0	0	0	0	0.0165138	0	0	0	0	0	0	0	0	0	0	0	0	0
17.4	0	0	0	0	0	0	0	0	0	0	0	0	0	0	0	0	0	0	0	0
18	0	0.240296	0	0	0.0825688	0.0018315	0.0229358	0	0.0567766	0.102564	0	0.0961538	0	0.00184162	0.0330275	0	0.0881801	0	0	0.21978
18.2	0	0	0	0	0	0	0	0	0	0	0	0.000915751	0	0	0	0	0	0	0	0
18.3	0	0.00369686	0	0	0	0	0.00366972	0	0	0	0	0.00824176	0	0	0	0	0	0	0	0
18.4	0	0	0	0	0	0	0	0	0	0	0	0	0	0	0	0	0	0	0	0
19	0	0.155268	0	0	0.0678899	0	0.00917431	0	0.295788	0.018315	0	0.0979853	0	0	0.0568807	0	0.0666041	0	0	0.128205
19.1	0	0.000924214	0	0	0	0	0	0	0	0	0	0	0	0	0	0	0	0	0	0
19.2	0	0	0	0	0	0	0	0	0	0	0	0.00915751	0	0	0	0	0	0	0	0
19.3	0	0	0	0	0	0	0.000917431	0	0	0	0	0.0604396	0	0	0	0	0	0	0	0
20	0	0.112754	0	0	0.0266055	0	0.00275229	0	0.0897436	0.0018315	0	0.0137363	0	0	0.100917	0	0.0637899	0	0	0.0238095
20.1	0	0	0	0	0	0	0	0	0	0	0	0	0	0	0	0	0	0	0	0
20.2	0	0	0	0	0	0	0	0	0	0	0	0.014652	0	0	0.00275229	0	0	0	0	0
20.3	0	0	0	0	0	0	0	0	0	0	0	0.102564	0	0	0	0	0	0	0	0
21	0	0.0711645	0	0	0.0183486	0	0	0	0.0540293	0.0018315	0	0.000915751	0	0	0.121101	0	0.0619137	0	0	0.000915751
21.1	0	0.000924214	0	0	0	0	0	0	0	0	0	0	0	0	0	0	0	0	0	0
21.2	0	0	0	0	0	0	0	0	0	0	0	0.00457875	0	0	0.00366972	0	0	0	0	0
21.3	0	0	0	0	0	0	0	0	0	0	0	0.0283883	0	0	0	0	0	0	0	0
22	0	0.0545287	0	0	0.00733945	0	0	0	0.0558608	0	0	0	0	0	0.189908	0	0.0159475	0	0	0
22.1	0	0	0	0	0	0	0	0	0	0	0	0	0	0	0	0	0	0	0	0
22.2	0	0	0	0	0	0	0	0	0	0	0	0.000915751	0	0	0.00458716	0	0	0	0	0
22.3	0	0	0	0	0	0	0	0	0	0	0	0.00457875	0	0	0.000917431	0	0	0	0	0
23	0	0.0304991	0	0	0.000917431	0	0	0	0.141026	0	0	0	0	0	0.155046	0	0.0150094	0	0	0
23.2	0	0	0	0	0	0	0	0	0	0	0	0	0	0	0.00366972	0	0	0	0	0
23.3	0	0	0	0	0	0	0	0	0	0	0	0.00549451	0	0	0	0	0	0	0	0
24	0	0.0166359	0	0	0	0	0	0	0.132784	0	0	0	0	0	0.158716	0	0.0131332	0	0	0
24.2	0	0	0	0	0	0	0	0	0	0	0	0	0	0	0.00366972	0	0	0	0	0
24.3	0	0	0	0	0	0	0	0	0	0	0	0	0	0	0	0	0	0	0	0
25	0	0.0110906	0	0	0	0	0	0	0.0641026	0	0	0	0	0	0.111927	0	0.00469043	0	0	0
25.2	0	0	0	0	0	0	0	0.00366636	0	0	0	0	0	0	0	0	0	0	0	0
26	0	0.000924214	0	0	0	0	0	0.00458295	0.018315	0	0	0	0	0	0.0366972	0	0.00281426	0	0	0
26.1	0	0	0	0	0	0	0	0	0	0	0	0	0	0	0	0	0	0	0	0
26.2	0	0	0	0	0	0	0	0	0	0	0	0	0	0	0	0	0	0	0	0
27	0	0	0	0	0	0	0	0.00733272	0.000915751	0	0	0	0	0	0.0110092	0	0.000938086	0	0	0
27.2	0	0	0	0	0	0	0	0	0	0	0	0	0	0	0	0	0.000938086	0	0	0
28	0	0	0	0	0	0	0	0.108158	0.000915751	0	0	0	0	0	0.000917431	0	0	0	0	0
28.2	0	0	0	0	0	0	0	0.00091659	0	0	0	0	0	0	0	0	0	0	0	0
29	0	0	0	0	0	0	0	0.219982	0	0	0	0	0	0	0	0	0	0	0	0
29.1	0	0	0	0	0	0	0	0	0	0	0	0	0	0	0	0	0	0	0	0
29.2	0	0	0	0	0	0	0	0.00274977	0	0	0	0	0	0	0	0	0	0	0	0
29.3	0	0	0	0	0	0	0	0	0	0	0	0	0	0	0	0	0	0	0	0
30	0	0	0	0	0	0	0	0.213566	0	0	0	0	0	0	0	0	0	0	0	0
30.1	0	0	0	0	0	0	0	0	0	0	0	0	0	0	0	0	0	0	0	0
30.2	0	0	0	0	0	0	0	0.04033	0	0	0	0	0	0	0	0	0	0	0	0
31	0	0	0	0	0	0	0	0.0394134	0	0	0	0	0	0	0	0	0	0	0	0
31.1	0	0	0	0	0	0	0	0	0	0	0	0	0	0	0	0	0	0	0	0
31.2	0	0	0	0	0	0	0	0.113657	0	0	0	0	0	0	0	0	0	0	0	0
32	0	0	0	0	0	0	0	0.0100825	0	0	0	0	0	0	0	0	0	0	0	0
32.1	0	0	0	0	0	0	0	0	0	0	0	0	0	0	0	0	0	0	0	0
32.2	0	0	0	0	0	0	0	0.076077	0	0	0	0	0	0	0	0	0	0	0	0
32.3	0	0	0	0	0	0	0	0	0	0	0	0	0	0	0	0	0	0	0	0
33	0	0	0	0	0	0	0	0.00091659	0	0	0	0	0	0	0	0	0	0	0	0
33.1	0	0	0	0	0	0	0	0	0	0	0	0	0	0	0	0	0	0	0	0
33.2	0	0	0	0	0	0	0	0.0531622	0	0	0	0	0	0	0	0	0	0	0	0
33.3	0	0	0	0	0	0	0	0	0	0	0	0	0	0	0	0	0	0	0	0
34	0	0	0	0	0	0	0	0	0	0	0	0	0	0	0	0	0	0	0	0
34.2	0	0	0	0	0	0	0	0.00641613	0	0	0	0	0	0	0	0	0	0	0	0
35	0	0	0	0	0	0	0	0	0	0	0	0	0	0	0	0	0	0	0	0
35.2	0	0	0	0	0	0	0	0.0256645	0	0	0	0	0	0	0	0	0	0	0	0
36.2	0	0	0	0	0	0	0	0.0210816	0	0	0	0	0	0	0	0	0	0	0	0
37.2	0	0	0	0	0	0	0	0.0174152	0	0	0	0	0	0	0	0	0	0	0	0
38.2	0	0	0	0	0	0	0	0.0192484	0	0	0	0	0	0	0	0	0	0	0	0
39.2	0	0	0	0	0	0	0	0.00824931	0	0	0	0	0	0	0	0	0	0	0	0
40.2	0	0	0	0	0	0	0	0.00733272	0	0	0	0	0	0	0	0	0	0	0	0
R	0	0	0	0	0.00183486	0	0	0	0	0	0	0	0	0	0	0	0	0	0	0
N	1073	1082	1086	1092	1090	1092	1090	1091	1092	1092	1082	1092	1088	1086	1090	1067	1066	1092	1068	1092
p-value	0.0006	0.1231	0.2739	0.5598	0.0348	0.0479	0.0605	0.0025	0.0425	0.4352	0.5017	0.0103	0.2102	0.0475	0.121	0.0075	0.0014	0.3305	0.0007	0.0008
-2ln(p)	14.8372	4.18952	2.58998	1.16035	6.71628	6.07728	5.61022	11.9829	6.3165	1.6639	1.37951	9.15122	3.11939	6.09405	4.22393	9.7857	13.1426	2.2143	14.5289	14.2618
HO	0.641026	0.824176	0.747253	0.74359	0.857143	0.650183	0.824176	0.840659	0.820513	0.705128	0.728938	0.860806	0.738095	0.798535	0.862637	0.739927	0.857143	0.734432	0.617216	0.767399
HE	0.724358	0.855406	0.748629	0.732416	0.869363	0.691147	0.849018	0.867449	0.84638	0.740572	0.778107	0.872384	0.751174	0.833354	0.871452	0.8084	0.924532	0.735095	0.666807	0.790345
Australian Asian allele frequencies
Allele	CSF	D12	D13	D16	D18	D19	D1	D21	D2S	D3	D5	D6	D7	D8	FGA	Penta D	Penta E	TH01	TPOX	vWA
2.2	0	0	0	0	0	0	0	0	0	0	0	0	0	0	0	0	0	0	0	0
5	0	0	0.000505817	0	0	0	0	0	0	0	0	0	0	0	0	0.000508906	0.0505618	0	0	0
5.3	0	0	0	0	0	0	0	0	0	0	0	0	0	0	0	0	0	0	0	0
6	0	0	0	0.000505051	0	0	0	0	0	0	0	0	0	0	0	0.00101781	0.000510725	0.140909	0.000513347	0
6.3	0	0	0	0	0	0	0	0	0	0	0	0	0	0	0	0	0	0	0	0
7	0.00457085	0	0.00151745	0	0	0	0.000505051	0	0	0	0.0243284	0	0.00708861	0	0	0.0198473	0.0127681	0.278788	0	0
7.3	0	0	0	0	0	0	0	0	0	0	0	0	0	0	0	0	0	0	0	0
7.4	0	0	0	0	0	0	0	0	0	0	0	0	0	0	0	0.000508906	0	0	0	0
8	0.00406298	0	0.274153	0.00606061	0.000505051	0	0.000505051	0	0	0	0	0.000505306	0.176709	0.0020202	0	0.0580153	0.00510725	0.0621212	0.541581	0
8.1	0	0	0	0	0	0	0	0	0	0	0	0	0	0	0	0	0	0	0	0
8.3	0	0	0	0	0	0	0	0	0	0	0	0	0	0	0	0	0	0	0	0
9	0.0370747	0	0.129489	0.218687	0	0.00252525	0	0	0	0	0.0582869	0.00202122	0.0617722	0.00252525	0	0.345038	0.0132789	0.405051	0.112936	0
9.1	0	0	0	0	0	0	0	0	0	0	0	0	0.00101266	0	0	0	0	0	0	0
9.2	0	0	0	0	0	0	0	0	0	0	0	0	0.000506329	0	0	0	0	0	0	0
9.3	0	0	0	0	0	0	0	0	0	0	0	0	0	0	0	0	0	0.0681818	0	0
10	0.233621	0	0.131007	0.139899	0.00252525	0.0010101	0.0020202	0	0	0	0.211353	0.0303183	0.164557	0.141414	0	0.147583	0.0485189	0.0424242	0.0354209	0
10.1	0	0	0	0	0	0	0	0	0	0	0	0	0	0	0	0	0	0	0	0
10.3	0	0	0	0	0	0	0	0	0	0	0	0	0	0	0	0	0	0.000505051	0	0
11	0.259015	0	0.244815	0.294949	0.00757576	0.00505051	0.0762626	0	0	0	0.306133	0.151086	0.352911	0.106566	0	0.136387	0.185904	0.0020202	0.276694	0
11.1	0	0	0	0	0	0	0	0	0	0	0	0	0.000506329	0	0	0	0	0	0	0
11.2	0	0	0	0	0	0	0	0	0	0	0	0	0	0	0	0	0	0	0	0
11.3	0	0	0	0	0	0	0	0	0	0	0	0	0	0	0	0	0	0	0	0
12	0.359066	0	0.160344	0.220707	0.0545455	0.0494949	0.05	0	0	0.00151515	0.244805	0.147549	0.194937	0.120707	0	0.155725	0.115935	0	0.0323409	0
12.1	0	0	0	0	0	0	0	0	0	0	0.000506842	0	0	0	0	0.000508906	0	0	0	0
12.2	0	0	0	0	0	0.00505051	0	0	0	0	0	0	0	0	0	0	0	0	0	0
12.3	0	0	0	0	0	0	0	0	0	0	0	0.000505306	0	0	0	0	0	0	0	0
12.4	0	0	0	0	0	0	0	0	0	0	0	0	0	0	0	0	0.000510725	0	0	0
13	0.0817674	0	0.047041	0.102525	0.14596	0.273737	0.0868687	0	0	0.0030303	0.145464	0.123295	0.0344304	0.205051	0.000505817	0.0905852	0.0617978	0	0.000513347	0.00101061
13.1	0	0	0	0	0	0	0	0	0	0	0	0	0	0	0	0	0	0	0	0
13.2	0	0	0	0	0.000505051	0.0368687	0	0	0	0	0	0	0	0	0	0	0	0	0	0
13.3	0	0	0	0	0	0	0	0	0	0	0	0	0	0	0	0	0	0	0	0
13.4	0	0	0	0	0	0	0	0	0	0	0	0	0	0	0	0	0	0	0	0
14	0.0182834	0.000506329	0.0106222	0.0151515	0.197475	0.25101	0.100505	0	0	0.040404	0.00861632	0.131885	0.00556962	0.175253	0	0.0335878	0.0832482	0	0	0.226882
14.2	0	0	0	0	0	0.110101	0	0	0	0	0	0	0	0	0	0	0	0	0	0
14.3	0	0	0	0	0	0	0.0010101	0	0	0	0	0	0	0	0	0	0	0	0	0
15	0.00253936	0.0116456	0.000505817	0.00151515	0.205556	0.0772727	0.279293	0	0	0.309596	0.000506842	0.0156645	0	0.15303	0	0.00814249	0.0893769	0	0	0.0419404
15.1	0	0	0	0	0	0	0.000505051	0	0	0	0	0	0	0	0	0	0	0	0	0
15.2	0	0	0	0	0	0.137879	0	0	0	0	0	0	0	0	0	0	0	0	0	0
15.3	0	0	0	0	0	0	0.00858586	0	0	0	0	0	0	0	0	0	0	0	0	0
15.4	0	0	0	0	0	0	0	0	0	0	0	0	0	0	0	0	0	0	0	0
16	0	0.0131646	0	0	0.151515	0.0161616	0.20202	0	0.020728	0.335859	0	0.00202122	0	0.0792929	0.00101163	0.00203562	0.0760981	0	0	0.171804
16.1	0	0	0	0	0	0	0	0	0	0	0	0	0	0	0	0	0	0	0	0
16.2	0	0	0	0	0	0.0287879	0	0	0	0	0	0	0	0	0	0	0	0	0	0
16.3	0	0	0	0	0	0	0.0161616	0	0	0	0	0	0	0	0	0	0	0	0	0
17	0	0.0906329	0	0	0.0813131	0.0020202	0.0717172	0	0.0889788	0.238889	0	0.042951	0	0.0111111	0.00202327	0	0.0658836	0	0	0.257201
17.1	0	0	0	0	0	0	0	0	0	0	0	0	0	0	0	0	0	0	0	0
17.2	0	0	0	0	0	0.0010101	0	0	0	0	0	0	0	0	0	0	0	0	0	0
17.3	0	0.00202532	0	0	0	0	0.0651515	0	0	0	0	0	0	0	0	0	0	0	0	0
17.4	0	0	0	0	0	0	0	0	0	0	0	0	0	0	0	0	0	0	0	0
18	0	0.20557	0	0	0.0515152	0.000505051	0.0116162	0	0.0970677	0.0651515	0	0.155634	0	0.0030303	0.019221	0	0.0638407	0	0	0.203133
18.1	0	0.000506329	0	0	0	0	0	0	0	0	0	0	0	0	0	0	0	0	0	0
18.2	0	0	0	0	0	0.00151515	0	0	0	0	0	0.00303183	0	0	0	0	0	0	0	0
18.3	0	0.00405063	0	0	0	0	0.0217172	0	0	0	0	0.000505306	0	0	0	0	0.000510725	0	0	0
18.4	0	0	0	0	0	0	0	0	0	0	0	0	0	0	0	0	0	0	0	0
19	0	0.180253	0	0	0.0378788	0	0.0020202	0	0.180485	0.00454545	0	0.139464	0	0	0.0703085	0	0.0449438	0	0	0.0742799
19.1	0	0.000506329	0	0	0	0	0	0	0	0	0	0	0	0	0	0	0	0	0	0
19.2	0	0	0	0	0	0	0	0	0	0	0	0	0	0	0	0	0	0	0	0
19.3	0	0	0	0	0	0	0.0010101	0	0	0	0	0	0	0	0	0	0	0	0	0
20	0	0.172658	0	0	0.0257576	0	0.000505051	0	0.127907	0.000505051	0	0.0424457	0	0	0.0682853	0	0.0398366	0	0	0.0212228
20.1	0	0	0	0	0	0	0	0	0	0	0	0	0	0	0	0	0	0	0	0
20.2	0	0	0	0	0	0	0	0	0	0	0	0	0	0	0.00101163	0	0	0	0	0
20.3	0	0	0	0	0	0	0.0010101	0	0	0	0	0.00151592	0	0	0	0	0	0	0	0
21	0	0.126076	0	0	0.0176768	0	0	0	0.0323559	0.000505051	0	0.00555836	0	0	0.115832	0	0.0199183	0	0	0.00252653
21.1	0	0	0	0	0	0	0	0	0	0	0	0	0	0	0	0	0	0	0	0
21.2	0	0	0	0	0	0	0	0	0	0	0	0	0	0	0.00758725	0	0	0	0	0
21.3	0	0	0	0	0	0	0	0	0	0	0	0.00404245	0	0	0	0	0	0	0	0
22	0	0.081519	0	0	0.0116162	0	0	0	0.0652174	0	0	0	0	0	0.187152	0	0.0137896	0	0	0
22.1	0	0	0	0	0	0	0	0	0	0	0	0	0	0	0	0	0	0	0	0
22.2	0	0	0	0	0	0	0	0	0	0	0	0	0	0	0.00657562	0	0	0	0	0
22.3	0	0	0	0	0	0	0	0	0	0	0	0	0	0	0	0	0	0	0	0
23	0	0.0653165	0	0	0.00555556	0	0	0	0.168857	0	0	0	0	0	0.155792	0	0.00459653	0	0	0
23.2	0	0	0	0	0	0	0	0	0	0	0	0	0	0	0.0091047	0	0	0	0	0
23.3	0	0	0	0	0	0	0	0	0	0	0	0	0	0	0	0	0	0	0	0
24	0	0.0303797	0	0	0.00252525	0	0	0	0.146613	0	0	0	0	0	0.174001	0	0.0020429	0	0	0
24.2	0	0	0	0	0	0	0	0	0	0	0	0	0	0	0.00961052	0	0	0	0	0
24.3	0	0.000506329	0	0	0	0	0	0	0	0	0	0	0	0	0	0	0	0	0	0
25	0	0.0126582	0	0	0	0	0	0	0.0637007	0	0	0	0	0	0.0940819	0	0.00102145	0	0	0
25.2	0	0	0	0	0	0	0	0	0	0	0	0	0	0	0.00657562	0	0	0	0	0
26	0	0.00151899	0	0	0	0	0	0.000505051	0.00606673	0	0	0	0	0	0.0480526	0	0	0	0	0
26.1	0	0	0	0	0	0	0	0	0	0	0	0	0	0	0.000505817	0	0	0	0	0
26.2	0	0	0	0	0	0	0	0	0	0	0	0	0	0	0.00151745	0	0	0	0	0
27	0	0.000506329	0	0	0	0	0	0.00959596	0.00202224	0	0	0	0	0	0.0156803	0	0	0	0	0
27.2	0	0	0	0	0	0	0	0	0	0	0	0	0	0	0	0	0	0	0	0
28	0	0	0	0	0	0	0	0.0651515	0	0	0	0	0	0	0.00505817	0	0	0	0	0
28.2	0	0	0	0	0	0	0	0.0020202	0	0	0	0	0	0	0	0	0	0	0	0
29	0	0	0	0	0	0	0	0.218687	0	0	0	0	0	0	0	0	0	0	0	0
29.1	0	0	0	0	0	0	0	0	0	0	0	0	0	0	0	0	0	0	0	0
29.2	0	0	0	0	0	0	0	0.0020202	0	0	0	0	0	0	0	0	0	0	0	0
29.3	0	0	0	0	0	0	0	0	0	0	0	0	0	0	0	0	0	0	0	0
30	0	0	0	0	0	0	0	0.258081	0	0	0	0	0	0	0	0	0	0	0	0
30.1	0	0	0	0	0	0	0	0	0	0	0	0	0	0	0	0	0	0	0	0
30.2	0	0	0	0	0	0	0	0.0237374	0	0	0	0	0	0	0	0	0	0	0	0
30.3	0	0	0	0	0	0	0	0.00252525	0	0	0	0	0	0	0	0	0	0	0	0
31	0	0	0	0	0	0	0	0.10101	0	0	0	0	0	0	0	0	0	0	0	0
31.1	0	0	0	0	0	0	0	0	0	0	0	0	0	0	0	0	0	0	0	0
31.2	0	0	0	0	0	0	0	0.0727273	0	0	0	0	0	0	0	0	0	0	0	0
32	0	0	0	0	0	0	0	0.0262626	0	0	0	0	0	0	0	0	0	0	0	0
32.1	0	0	0	0	0	0	0	0	0	0	0	0	0	0	0	0	0	0	0	0
32.2	0	0	0	0	0	0	0	0.148485	0	0	0	0	0	0	0	0	0	0	0	0
32.3	0	0	0	0	0	0	0	0	0	0	0	0	0	0	0	0	0	0	0	0
33	0	0	0	0	0	0	0	0.0040404	0	0	0	0	0	0	0	0	0	0	0	0
33.1	0	0	0	0	0	0	0	0	0	0	0	0	0	0	0	0	0	0	0	0
33.2	0	0	0	0	0	0	0	0.0555556	0	0	0	0	0	0	0	0	0	0	0	0
33.3	0	0	0	0	0	0	0	0	0	0	0	0	0	0	0	0	0	0	0	0
34	0	0	0	0	0	0	0	0	0	0	0	0	0	0	0	0	0	0	0	0
34.2	0	0	0	0	0	0	0	0.00707071	0	0	0	0	0	0	0	0	0	0	0	0
35	0	0	0	0	0	0	0	0	0	0	0	0	0	0	0	0	0	0	0	0
35.2	0	0	0	0	0	0	0	0	0	0	0	0	0	0	0	0	0	0	0	0
36.2	0	0	0	0	0	0	0	0	0	0	0	0	0	0	0	0	0	0	0	0
37.2	0	0	0	0	0	0	0	0.0010101	0	0	0	0	0	0	0	0	0	0	0	0
38.2	0	0	0	0	0	0	0	0.0010101	0	0	0	0	0	0	0	0	0	0	0	0
39.2	0	0	0	0	0	0	0	0.000505051	0	0	0	0	0	0	0	0	0	0	0	0
40.2	0	0	0	0	0	0	0	0	0	0	0	0	0	0	0	0	0	0	0	0
43.2	0	0	0	0	0	0	0	0	0	0	0	0	0	0	0.000505817	0	0	0	0	0
R	0	0	0	0	0	0	0.0010101	0	0	0	0	0	0	0	0	0.000508906	0	0	0	0
N	1969	1975	1977	1980	1980	1980	1980	1980	1978	1980	1973	1979	1975	1980	1977	1965	1958	1980	1948	1979
p-value	0.91	0.38	0.16	0.85	0.22	0	0.5	0.54	0.01	0.88	0.08	0.89	0.08	0.16	0.41	0.84	0.26	0.05	0.08	0.4
-2ln(p)	0.2	1.95	3.62	0.33	3.05	14.03	1.39	1.22	8.47	0.25	5.09	0.23	4.96	3.7	1.79	0.34	2.72	6.14	5.1	1.84
HO	0.726263	0.864646	0.806061	0.779798	0.834343	0.809091	0.833333	0.854545	0.851515	0.718182	0.743434	0.872727	0.8	0.862626	0.876768	0.778788	0.907071	0.722222	0.619192	0.791919
HE	0.740966	0.859002	0.802937	0.786117	0.859602	0.819993	0.844877	0.83927	0.873889	0.728372	0.776459	0.874256	0.774064	0.851468	0.875274	0.80315	0.909557	0.728044	0.615075	0.803858
Australian Caucasian allele frequencies
Allele	CSF	D12	D13	D16	D18	D19	D1	D21	D2	D3	D5	D6	D7	D8	FGA	Penta D	Penta E	TH01	TPOX	vWA
2.2	0	0	0	0	0	0	0	0	0	0	0	0	0	0	0	0.00236197	0	0	0	0
5	0	0	0	0	0	0	0	0	0	0	0	0	0	0	0	0	0.0810329	0.002936	0.000298775	0
6	0	0	0.000294551	0	0	0	0	0	0	0	0	0	0	0	0	0.00088574	0.000296824	0.233705	0.000298775	0
6.3	0	0	0	0	0	0	0	0	0	0	0	0	0.000294031	0	0	0	0	0	0	0
7	0.000887574	0	0.000883652	0	0	0	0	0	0	0	0.00117716	0	0.0167598	0	0	0.00295247	0.16266	0.186142	0.00149388	0
7.3	0	0	0	0	0	0	0	0	0	0	0	0	0	0	0	0	0	0	0.000298775	0
8	0.00502959	0	0.123711	0.0181818	0.000292912	0	0	0	0	0	0.00176574	0	0.162011	0.0190672	0	0.0188958	0.015138	0.0977686	0.537795	0
8.3	0	0	0	0	0	0	0	0	0	0	0	0	0.000294031	0	0	0	0	0	0	0
9	0.0236686	0	0.0815906	0.12434	0.000585823	0	0.000293083	0	0	0	0.0379635	0.000880282	0.156131	0.0102669	0	0.214349	0.00831107	0.149149	0.111144	0
9.1	0	0	0	0	0	0	0	0	0	0	0	0	0.000882094	0	0	0	0	0	0	0
9.2	0	0	0	0	0.000585823	0	0	0	0	0	0	0	0	0	0	0	0	0	0	0
9.3	0	0	0	0	0	0	0	0	0	0	0	0	0.000294031	0	0	0	0	0.322372	0	0
10	0.266272	0	0.0686303	0.0595308	0.00908026	0.000879765	0.00087925	0	0	0.000292997	0.0691583	0.0129108	0.271979	0.0932825	0	0.121051	0.091125	0.00792719	0.0600538	0
11	0.3	0	0.295434	0.290029	0.00966608	0.00322581	0.0770809	0	0	0.000878992	0.367569	0.320716	0.208468	0.0718686	0	0.141718	0.101514	0	0.249477	0.000586338
11.1	0	0	0	0	0	0	0	0	0	0	0	0	0.000294031	0	0	0	0	0	0	0
11.3	0.000591716	0	0	0	0	0	0	0	0	0	0	0	0	0	0	0	0	0	0	0
12	0.318639	0	0.286598	0.298534	0.147042	0.0741935	0.131301	0	0	0.000292997	0.344614	0.258509	0.145251	0.146377	0	0.210806	0.18225	0	0.0379444	0
12.1	0	0	0	0.000293255	0	0	0	0	0	0	0	0	0	0	0	0	0	0	0	0
12.2	0	0	0.000294551	0	0	0.00117302	0	0	0	0	0	0	0	0	0	0	0	0	0	0
13	0.0704142	0	0.0969072	0.179472	0.119215	0.252493	0.0600821	0	0.000588062	0.00380897	0.166569	0.0801056	0.0305792	0.324729	0	0.198996	0.112199	0	0.00059755	0.00175901
13.2	0	0	0	0	0	0.0129032	0	0	0	0	0	0	0	0	0	0	0	0	0	0
13.3	0	0	0	0	0.000292912	0	0	0	0	0	0	0.000293427	0	0	0	0	0	0	0	0
13.4	0	0	0	0	0	0	0	0	0	0	0	0	0	0	0	0.000590493	0	0	0	0
14	0.0115385	0	0.0435935	0.027566	0.16403	0.35044	0.0917351	0	0	0.121008	0.00912301	0.0548709	0.00676272	0.191845	0	0.0631828	0.0549124	0	0.00059755	0.101143
14.2	0	0	0	0	0	0.0252199	0	0	0	0	0	0	0	0	0	0	0	0	0	0
14.3	0	0	0	0	0	0	0.0052755	0	0	0	0	0	0	0	0	0	0	0	0	0
15	0.00295858	0.0361552	0.00206186	0.00205279	0.135325	0.167742	0.143904	0	0.000294031	0.272195	0.00206004	0.00733568	0	0.109416	0.000587372	0.0186005	0.0451172	0	0	0.118734
15.2	0	0	0	0	0	0.0366569	0	0	0	0	0	0	0	0	0	0	0	0	0	0
15.3	0	0	0	0	0.000292912	0	0.0691676	0	0	0	0	0	0	0	0	0	0	0	0	0
15.4	0	0	0	0	0	0	0	0	0	0	0	0	0	0	0	0	0.000296824	0	0	0
16	0	0.0305703	0	0	0.139719	0.0519062	0.11694	0	0.0311673	0.252857	0	0.00586854	0	0.0287474	0	0.0038382	0.0477887	0	0	0.215773
16.1	0	0	0	0	0	0	0.00087925	0	0	0	0	0	0	0	0	0	0	0	0	0
16.2	0	0	0	0	0.000292912	0.0134897	0	0	0	0	0	0	0	0	0	0	0	0	0	0
16.3	0	0.000587889	0	0	0	0	0.0565651	0	0	0	0	0	0	0	0	0	0	0	0	0
17	0	0.111993	0	0	0.126831	0.00439883	0.0512896	0	0.205234	0.194843	0	0.0510563	0	0.00381344	0.000293686	0.00147623	0.0483823	0	0	0.262093
17.1	0	0	0	0	0	0	0.00087925	0	0	0	0	0	0	0	0	0	0	0	0	0
17.2	0	0	0	0	0	0.00293255	0	0	0	0	0	0	0	0	0	0	0	0	0	0
17.3	0	0.0199882	0	0	0	0	0.129543	0	0	0	0	0	0	0	0	0	0	0	0	0
17.4	0	0	0	0	0	0	0	0	0	0	0	0	0	0	0	0	0.000296824	0	0	0
18	0	0.1699	0	0	0.0679555	0.000293255	0.003517	0	0.0867392	0.141225	0	0.0721831	0	0.000586682	0.014978	0.000295247	0.0261205	0	0	0.208443
18.2	0	0	0	0	0	0.00146628	0	0	0	0	0	0	0	0	0	0	0	0	0	0
18.3	0	0.0202822	0	0	0	0	0.0512896	0	0	0	0	0	0	0	0	0	0	0	0	0.000293169
18.4	0	0	0	0	0	0	0	0	0	0	0	0	0	0	0	0	0.000296824	0	0	0
19	0	0.117578	0	0	0.0442296	0	0.00087925	0	0.11232	0.0125989	0	0.0941901	0	0	0.0687225	0	0.0103888	0	0	0.0750513
19.1	0	0.000293945	0	0	0	0	0	0	0	0	0	0	0	0	0	0	0	0	0	0
19.2	0	0.000293945	0	0	0	0	0	0	0	0	0	0	0	0	0.000293686	0	0	0	0	0
19.3	0	0.00940623	0	0	0	0	0.00791325	0	0	0	0	0	0	0	0	0	0	0	0	0
20	0	0.109053	0	0	0.019918	0	0	0	0.132608	0	0	0.0325704	0	0	0.13862	0	0.00593648	0	0	0.0140721
20.2	0	0	0	0	0	0	0	0	0	0	0	0	0	0	0.00234949	0	0	0	0	0
20.3	0	0.000587889	0	0	0	0	0.000586166	0	0	0	0	0.000293427	0	0	0	0	0	0	0	0
21	0	0.114051	0	0	0.0076157	0	0	0	0.0320494	0	0	0.00586854	0	0	0.18091	0	0.00385871	0	0	0.00205218
21.2	0	0	0	0	0	0	0	0	0	0	0	0.000293427	0	0	0.00323054	0	0	0	0	0
21.3	0	0	0	0	0	0	0	0	0	0	0	0.00176056	0	0	0	0	0	0	0	0
22	0	0.112287	0	0	0.00410076	0	0	0	0.0338136	0	0	0.000293427	0	0	0.177093	0	0.00148412	0	0	0
22.1	0	0	0	0	0	0	0	0	0	0	0	0	0	0	0.000293686	0	0	0	0	0
22.2	0	0	0	0	0	0	0	0	0	0	0	0	0	0	0.0126285	0	0	0	0	0
22.3	0	0	0	0	0	0	0	0	0	0	0	0	0	0	0.000293686	0	0	0	0	0
23	0	0.0834803	0	0	0.00205038	0	0	0	0.114966	0	0	0	0	0	0.147724	0	0.000593648	0	0	0
23.2	0	0	0	0	0	0	0	0	0	0	0	0	0	0	0.00499266	0	0	0	0	0
23.3	0	0	0	0	0	0	0	0	0.000294031	0	0	0	0	0	0	0	0	0	0	0
24	0	0.0343915	0	0	0.000292912	0	0	0	0.113496	0	0	0	0	0	0.131571	0	0	0	0	0
24.2	0	0	0	0	0	0	0	0.0026393	0	0	0	0	0	0	0	0	0	0	0	0
25	0	0.0223398	0	0	0.000585823	0	0	0.000293255	0.111438	0	0	0	0	0	0.0737151	0	0	0	0	0
25.2	0	0	0	0	0	0	0	0.000879765	0	0	0	0	0	0	0	0	0	0	0	0
26	0	0.00440917	0	0	0	0	0	0.00117302	0.0214643	0	0	0	0	0	0.030837	0	0	0	0	0
26.2	0	0	0	0	0	0	0	0.000293255	0	0	0	0	0	0	0	0	0	0	0	0
27	0	0.00235156	0	0	0	0	0	0.0340176	0.00264628	0	0	0	0	0	0.0082232	0	0	0	0	0
28	0	0	0	0	0	0	0	0.154839	0.000294031	0	0	0	0	0	0.000881057	0	0	0	0	0
29	0	0	0	0	0	0	0	0.207918	0	0	0	0	0	0	0	0	0	0	0	0
29.2	0	0	0	0	0	0	0	0.00146628	0	0	0	0	0	0	0	0	0	0	0	0
30	0	0	0	0	0	0	0	0.252786	0	0	0	0	0	0	0	0	0	0	0	0
30.2	0	0	0	0	0	0	0	0.0313783	0	0	0	0	0	0	0	0	0	0	0	0
31	0	0	0	0	0	0	0	0.0744868	0	0	0	0	0	0	0	0	0	0	0	0
31.2	0	0	0	0	0	0	0	0.0932551	0	0	0	0	0	0	0	0	0	0	0	0
32	0	0	0	0	0	0	0	0.013783	0	0	0	0	0	0	0	0	0	0	0	0
32.2	0	0	0	0	0	0	0	0.0938416	0	0	0	0	0	0	0	0	0	0	0	0
33	0	0	0	0	0	0	0	0.00146628	0	0	0	0	0	0	0	0	0	0	0	0
33.2	0	0	0	0	0	0	0	0.0304985	0	0	0	0	0	0	0	0	0	0	0	0
34.2	0	0	0	0	0	0	0	0.00322581	0	0	0	0	0	0	0	0	0	0	0	0
35	0	0	0	0	0	0	0	0.000293255	0	0	0	0	0	0	0	0	0	0	0	0
35.2	0	0	0	0	0	0	0	0.000879765	0	0	0	0	0	0	0	0	0	0	0	0
39.2	0	0	0	0	0	0	0	0.00058651	0	0	0	0	0	0	0	0	0	0	0	0
R	0	0	0	0	0	0.00058651	0	0	0.000588062	0	0	0	0	0	0.00176211	0	0	0	0	0
N	3380	3402	3395	3410	3414	3410	3412	3410	3401	3413	3398	3408	3401	3409	3405	3387	3369	3406	3347	3411
p-value	0.6137	0.118	0.2737	0.5231	0.1489	0.0111	0.9969	0.925	0.3576	0.7073	0.4635	0.934	0.6804	0.7706	0.0197	0.1797	0.1837	0.0984	0.1942	0.9889
-2ln(p)	0.976498	4.27414	2.59145	1.29597	3.80896	9.00162	0.00621	0.155923	2.05668	0.692601	1.5379	0.136558	0.770149	0.521172	7.85427	3.43293	3.3889	4.63743	3.27773	0.022324
HO	0.283538	0.115993	0.196251	0.226714	0.118922	0.225542	0.104862	0.158172	0.125366	0.21031	0.300527	0.198008	0.194493	0.181605	0.137668	0.17106	0.118922	0.223199	0.369069	0.188635
HE	0.732238	0.896095	0.790375	0.772771	0.875609	0.773392	0.900187	0.842731	0.877161	0.788079	0.713161	0.803861	0.809576	0.809469	0.86691	0.831261	0.891555	0.774622	0.630675	0.811668

## Sheet: p values
Aboriginal declared results of tests for linkage disequilibrium (p-values)
	CSF	D12	D13	D16	D18	D19	D1	D21	D2	D3	D5	D6	D7	D8	FGA	PentaD	PentaE	TH01	TPOX
D12	0.4002
D13	0.3046	0.0004
D16	0.112	0.2164	0.0016
D18	0.6646	0.3912	0.9674	0.1535
D19	0.6539	0.3204	0.1254	0.0414	0.4041
D1	0.1597	0.0457	0.0601	0.1958	0.217	0.4099
D21	0.2283	0.7415	0.6547	0.9485	0.023	0.9602	0.4587
D2	0.3018	0.0002	0.5987	0.1866	0.7464	0.3327	0.1101	0.8444
D3	0.9614	0.0665	0.7074	0.0535	0.8881	0.4049	0.0188	0.9182	0.0641
D5	0.5999	0.6984	0.3622	0.1439	0.2691	0.5647	0.2109	0.0922	0.0324	0.9364
D6	0.09	0.6066	0.9522	0.626	0.0352	0.5841	0.8163	0.2274	0.3762	0.8919	0.1029
D7	0.5637	0.5929	0.1635	0.9334	0.0975	0.5177	0.1645	0.6447	0.0171	0.2024	0.3622	0.0524
D8	0.0073	0.0549	0.8238	0.4979	0.1006	0.4928	0.1893	0.7312	0.8571	0.9348	0.6102	0.5052	0.4751
FGA	0.8145	0.6222	0.2351	0.5133	0.8675	0.4977	0.7029	0.0977	0.9615	0.9551	0.6068	0.0654	0.756	0.9363
PentaD	0.5385	0.4838	0.0335	0.0988	0.775	0.0388	0.0586	0.0469	0.1664	0.4366	0.2662	0.7338	0.1222	0.0092	0.9293
PentaE	0.6544	0.0956	0.1077	0.0076	0.0462	0.0461	0.8643	0.7318	0.1465	0.5004	0.1285	0.7466	0.3491	0.9415	0.2313	0.0419
TH01	0.0216	0.3768	0.3415	0.2314	0.132	0.1372	0.0001	0.9872	0.0595	0.2026	0.1623	0.8656	0.0581	0.6937	0.1626	0	0.9026
TPOX	0.8502	0.2971	0.516	0.9076	0.2303	0.7727	0.0737	0.5059	0.0444	0.2252	0.0144	0.1312	0.1433	0.0944	0.5481	0.2826	0.0007	0
vWA	0.3548	0.4033	0.7633	0.597	0.4554	0.2549	0.0811	0.1496	0.1953	0.9522	0.4887	0.472	0.4783	0.8144	0.6317	0.3043	0.411	0.017	0.8818
Aboriginal NT Pure results of tests for linkage disequilibrium (p-values)
	CSF	D12	D13	D16	D18	D19	D1	D21	D2	D3	D5	D6	D7	D8	FGA	PentaD	PentaE	TH01	TPOX
D12	0.93
D13	0.2901	0.3323
D16	0.791	0.5247	0.0763
D18	0	0.0438	0.6878	0.252
D19	0.1708	0.0292	0.0253	0.5518	0.0423
D1	0.0209	0.033	0.0003	0.1442	0.0263	0.6752
D21	0.0372	0.384	0.0551	0.1989	0.1069	0.8254	0.1999
D2	0.304	0.3605	0.0003	0.5346	0.1564	0.1557	0.0893	0.1739
D3	0.0023	0.7137	0.2342	0.1545	0.4892	0.2372	0.0103	0.0882	0.0652
D5	0.2915	0.2429	0.091	0.2715	0.0246	0.0862	0.5331	0.3001	0.6876	0.056
D6	0.2595	0.0122	0.7909	0.0591	0.073	0.3112	0.1624	0.2225	0.2683	0.3232	0.699
D7	0.1201	0.0059	0.0035	0.6941	0.086	0.1654	0.008	0.9891	0.039	0.1009	0.0725	0.3228
D8	0.2982	0.4544	0.5884	0.4295	0.404	0.0615	0.0755	0.415	0.3931	0.2496	0.0778	0.73	0.1875
FGA	0.0639	0.2454	0.3496	0.0604	0.013	0.3479	0.418	0.0553	0.101	0.0052	0.4563	0.0203	0.4301	0.0438
PentaD	0.0087	0.4572	0.269	0.8645	0.0002	0.2906	0.1457	0.6551	0.4236	0.3083	0.2314	0.0392	0.0258	0.0489	0.7007
PentaE	0.0209	0.4423	0.0669	0.1184	0.0016	0.0102	0.1103	0.2118	0.0015	0.3099	0	0.4717	0.0219	0.0235	0.12	0.1104
TH01	0.2473	0.0037	0.1392	0.606	0.1171	0.0001	0.0131	0.6749	0.4572	0.0875	0.5927	0.3879	0.0106	0.1712	0.036	0.0292	0.2338
TPOX	0.0086	0.0015	0.0058	0.4599	0.6626	0.0954	0.1291	0.0844	0.0048	0.2766	0.2619	0.0974	0.0799	0.0641	0.6693	0.0544	0.2012	0.2201
vWA	0.7693	0.6813	0.2329	0.2686	0.0009	0.5285	0.368	0.0716	0.4897	0.6378	0.2578	0.2316	0.3089	0.0276	0.2327	0.1365	0.1672	0.3825	0.6029
Australian Asian results of tests for linkage disequilibrium (p-values)
	CSF	D12	D13	D16	D18	D19	D1	D21	D2	D3	D5	D6	D7	D8	FGA	PentaD	PentaE	TH01	TPOX
D12	0.07
D13	0.39	0.33
D16	0.15	0.89	0.73
D18	0.74	0.71	0.11	0.81
D19	0.97	0.95	0.18	0.4	0.7
D1	0.89	0.43	0.04	0.24	0.6	0.05
D21	0.77	0.18	0.23	0.27	0.06	0.51	0.33
D2	0.52	0.13	0.66	0.27	0.76	0.67	0.43	0.36
D3	0.51	0.47	0.65	0.18	0.46	0.73	0.03	0.97	0.94
D5	0.78	0.26	0.43	0.98	0.48	0.17	0.7	0.84	0.73	0.96
D6	0.78	0.42	0.41	0.35	0.19	0.43	0.25	0.09	0.57	0.66	0.19
D7	0.2	0.43	0.4	0.87	0.86	0.34	0.05	0.45	0.01	0.05	0.85	0.51
D8	0.13	0.92	0.59	0.57	0.45	0.52	0.72	0.9	0.29	0.91	0.05	0.83	0.55
FGA	0.72	0.96	0.08	0.91	0.28	0.03	0.26	0.35	0.7	0.4	0.88	0.25	0.07	0.02
PentaD	0.6	0.43	0.14	0.52	0.41	0.89	0.25	0.34	0.91	0.72	0.67	0.11	1	0.46	0.15
PentaE	0.31	0.19	0.34	0.67	0.4	0.63	0.25	0.81	0.2	0.86	0.77	0.28	0.02	0.72	0.03	0.49
TH01	0.37	0.02	0.14	0.53	0.01	0.13	0.52	0.38	0.19	0.39	0.97	0.25	0.41	0.26	0.28	0.1	0.32
TPOX	0.95	0.38	0.47	0.12	0.38	0.1	0	0.95	0.05	0.32	0.72	0.96	0.94	0.52	0.51	0.07	0.07	0.1
vWA	0.13	0.36	0.71	0.25	0.4	0.56	0.14	0.08	0.1	0.6	0.22	0.11	0.26	0.24	0.6	0.6	0.23	0.85	0.3
Australian Caucasian results of tests for linkage disequilibrium (p-values)
	CSF	D12	D13	D16	D18	D19	D1	D21	D2	D3	D5	D6	D7	D8	FGA	PentaD	PentaE	TH01	TPOX
D12	0.4895
D13	0.195	0.3536
D16	0.0198	0.3105	0.3277
D18	0.4533	0.4203	0.4158	0.8231
D19	0.4378	0.5038	0.4406	0.8623	0.2114
D1	0.8874	0.9961	0.6205	0.0623	0.1667	0.3394
D21	0.5496	0.0163	0.8061	0.1047	0.5793	0.6459	0.5107
D2	0.3826	0.5465	0.3723	0.8122	0.0156	0.6615	0.1857	0.1508
D3	0.242	0.6039	0.4973	0.1305	0.9759	0.8988	0.5277	0.6837	0.5412
D5	0.5926	0.1223	0.7383	0.3645	0.2384	0.9633	0.4174	0.7782	0.5044	0.6628
D6	0.7072	0.7779	0.0554	0.1385	0.0574	0.1562	0.114	0.1639	0.7596	0.5924	0.6717
D7	0.3496	0.1027	0.6871	0.4568	0.0632	0.0216	0.9061	0.7979	0.7313	0.2981	0.8019	0.7117
D8	0.8082	0.3602	0.2847	0.0571	0.4123	0.4704	0.3283	0.6318	0.4075	0.0287	0.5157	0.0576	0.2189
FGA	0.23	0.5486	0.4022	0.1889	0.0594	0.3204	0.2384	0.0366	0.7174	0.4943	0.7577	0.6132	0.7105	0.7986
PentaD	0.9636	0.8479	0.8452	0.0405	0.3118	0.5552	0.487	0.324	0.4298	0.9881	0.0951	0.5609	0.4074	0.752	0.7688
PentaE	0.0434	0.9418	0.4537	0.8316	0.3136	0.5616	0.5094	0.8707	0.4504	0.7784	0.0833	0.219	0.4534	0.0901	0.6724	0.5883
TH01	0.7682	0.7502	0.654	0.2173	0.5895	0.2579	0.0834	0.1224	0.7501	0.581	0.555	0.1185	0.2694	0.3669	0.0651	0.5841	0.2057
TPOX	0.3224	0.4026	0.3193	0.5709	0.8433	0.4846	0.4498	0.7265	0.8717	0.7387	0.9954	0.4404	0.2953	0.5587	0.8715	0.068	0.3794	0.6662
vWA	0.0207	0.8413	0.7677	0.1603	0.0883	0.7259	0.5767	0.4423	0.6445	0.3785	0.0689	0.1871	0.9012	0.0068	0.3736	0.0009	0.275	0.683	0.74
